# Supplementary material for: A graphene oxide layer as an acid-resisting barrier deposited on a zeolite LTA membrane for dehydration of acetic acid
Source: Royal Society of Chemistry journal article supplement (doi:10.1039/c6ra00802j), 2016-01-01
Supplement: c6ra00802j1.pdf [file c6ra00802j1.pdf]

## **Supplemental Information**

### **Graphene Oxide Layer as Acid-Resisting Barrier Deposited on Zeolite LTA Membrane for Dehydration of Acetic Acid**

Kai Xu, Zhenqi Jiang, Bo Feng, and Aisheng Huang

Institute of New Energy Technology, Ningbo Institute of Materials Technology and Engineering, CAS,  
1219 Zhongguan Road, 315201 Ningbo, P. R. China

**Fig. S1.**

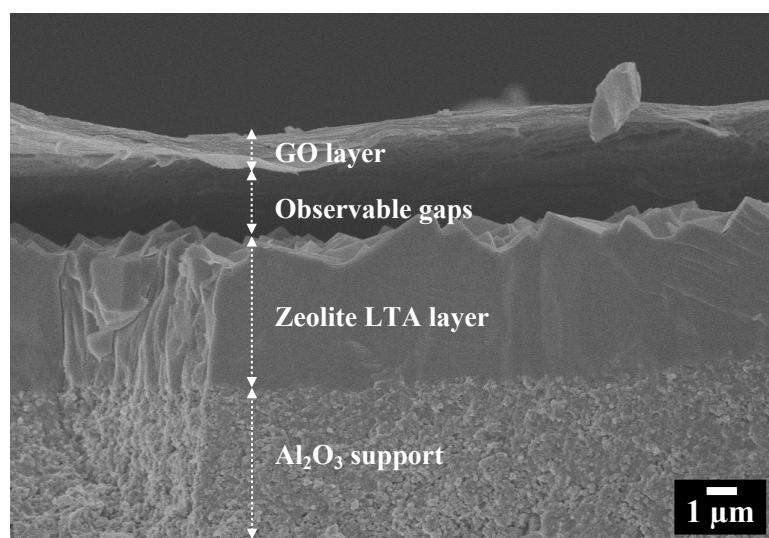

**Fig. S1.** Cross-section FESEM image of the LTA@GO membrane when GO layer was prepared on PDA-free zeolite LTA bottom layer.

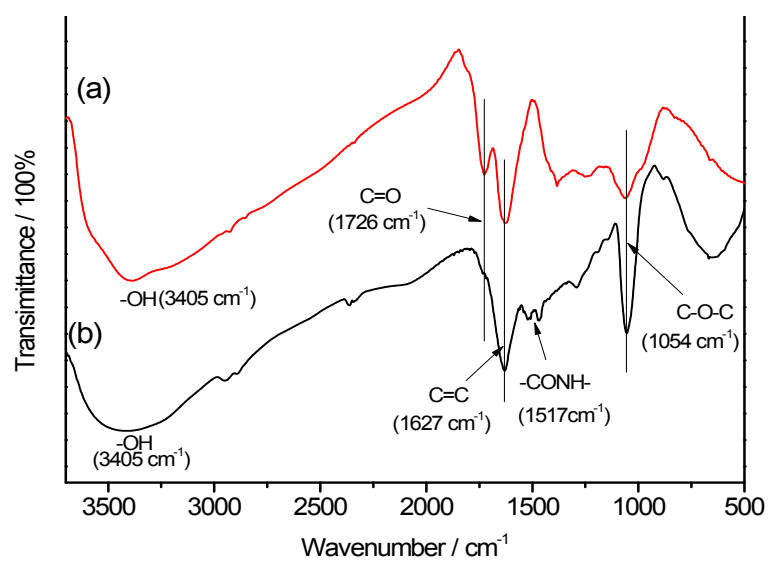

**Fig. S2.** FT-IR spectra of the GO (a) and (b) PDA-modified GO powders.

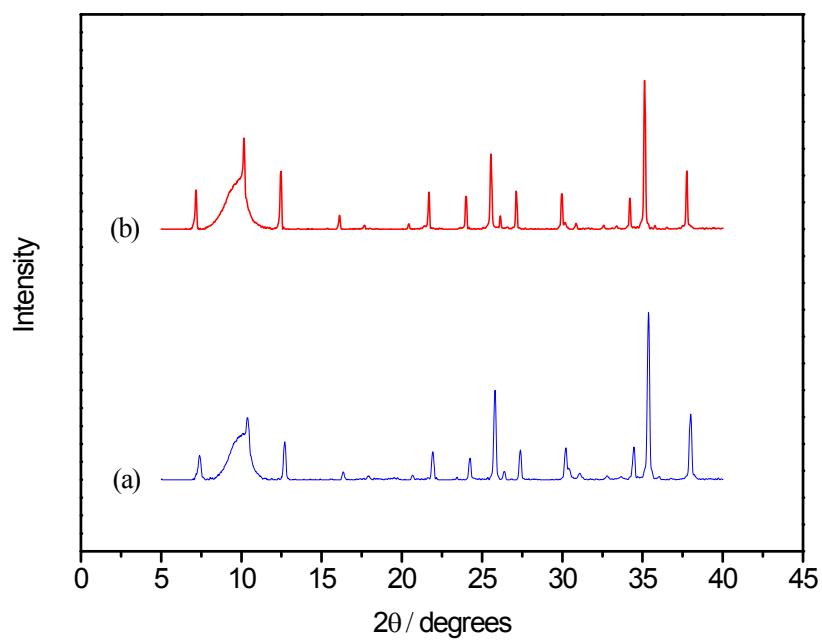

**Fig. S3.** XRD patterns of the LTA@GO composite membrane before (a) and after (b) the separation of 95 wt% acetic acid/water mixture by pervaporation for 168 h at 333 K.

**Table S1.** Comparisons of the pervaporation properties of the developed LTA@GO membrane in this study with literature data for Acetic acid/water separation

| Membrane                   | HAc/H <sub>2</sub> O (wt%) | Temperature (K) | Separation factor | Flux (kg·m <sup>-2</sup> ·h <sup>-1</sup> ) | Reference |
|----------------------------|----------------------------|-----------------|-------------------|---------------------------------------------|-----------|
| MOR                        | 90/10                      | 80              | 50                | <0.05                                       | [1]       |
|                            | 50/50                      | 80              | 299               | 0.614                                       |           |
| Ge-ZSM-5                   | 5/95                       | 90              | 14                | 0.43                                        | [2]       |
| ZSM-5                      | 90/10                      | 75              | 165               | 0.25                                        | [3]       |
| MOR/ZSM-5 hybrid membranes | 40/50                      | 80              | 150               | 5.6                                         | [4]       |
|                            | 70/30                      | 80              | 290               | 3.2                                         |           |
|                            | 90/10                      | 80              | 230               | 0.8                                         |           |
| MOR                        | 90/10                      | 75              | 2300              | 0.44                                        | [5]       |
| MOR                        | 50/50                      | 60              | 640               | 0.89                                        | [6]       |
| MOR                        | 90/10                      | 75              | 400               | 0.067                                       | [7]       |
| ZSM-5                      | 90/10                      | 75              | 720               | 0.42                                        |           |
| MOR                        | 90/10                      | 100             | 158               | 0.133                                       | [8]       |
| ZSM-5                      | 75~96.5                    | 80              | ∞                 | 1.1~2.67                                    | [9]       |
| T                          | 50/50                      | 75              | 182               | 1.46                                        | [10]      |
| LTA@GO                     | 95/5                       | 60              | ~400              | ~1.5                                        | This work |

References in Table S1:

1. G. Li, E. Kikuchi and M. Matsukata, *Sep. Purif. Technol.*, 2003, **32**, 199-206.
2. S. G. Li, V. A. Tuan, R. D. Noble and J. L. Falconer, *Ind. Eng. Chem. Res.*, 2001, **40**, 6165-6171.
3. M. Zhu, I. Kumakiri, K. Tanaka and H. Kita, *Microporous Mesoporous Mater.*, 2013, **181**, 47-53.
4. K. Sato, K. Sugimoto, T. Kyotani, N. Shimotsuma and T. Kurata, *Microporous Mesoporous Mater.*, 2012, **160**, 85-96.
5. M. Zhu, S. Xia, X. Hua, Z. Feng, N. Hu, F. Zhang, I. Kumakiri, Z. Lu, X. Chen and H. Kita, *Ind. Eng. Chem. Res.*, 2014, **53**, 19168-19174.
6. K. Sato, K. Sugimoto, T. Kyotani, N. Shimotsuma and T. Kurata, *J. Membr. Sci.*, 2011, **385**, 20-29.
7. X. Li, H. Kita, H. Zhu, Z. Zhang and K. Tanaka, *J. Membr. Sci.*, 2009, **339**, 224-232.
8. Y. Zhang, Y. Nakasaka, T. Tago, A. Hirata, Y. Sato and T. Masuda, *Microporous Mesoporous Mater.*, 2015, **207**, 39-45.
9. J. Yang, L. Li, W. Li, J. Wang, Z. Chen, D. Yin, J. Lu, Y. Zhang and H. Guo, *Chem. Commun.*, 2014, **50**, 14654-14657.
10. K. Tanaka, R. Yoshikawa, C. Ying, H. Kita and K. Okamoto, *Catal. Today*, 2001, **67**, 121-125.
